1                   Species Tailoured Contribution of Volumetric  
2                   Growth and Tissue Convergence to Posterior Body  
3                   Elongation in Vertebrates

4  
5   **Running title:** Growth and Posterior Elongation

6   **Keywords:** Posterior body elongation, Zebrafish, Mouse, Lamprey, Dogfish,  
7   Volumetric Growth

8  
9   Ben Steventon<sup>1,2\*</sup>, Fernando Duarte<sup>1</sup>, Ronan Lagadec<sup>3</sup>, Sylvie Mazan<sup>3</sup> Jean-  
10   François Nicolas<sup>1</sup>, and Estelle Hirsinger<sup>1,4</sup>

11   <sup>1</sup>Department of Developmental and Stem Cell Biology, Institut Pasteur, 25 rue du Doctor Roux, Paris,  
12   France.

13   <sup>2</sup>Present address: Department of Genetics, University of Cambridge, Cambridge CB2 3EH, UK

14   <sup>3</sup>Development and Evolution of Vertebrates, CNRS-UPMC-UMR 7150, Station Biologique, Roscoff,  
15   France

16   <sup>4</sup>Present address: Laboratoire de Biologie du Développement (LBD), CNRS, UPMC, UMR 7622  
17   INSERM ERL U1156 IBPS (Institut Biologie Paris Seine) Campus de Jussieu 9 Quai Saint-Bernard,  
18   Bâtiment C, 6E, Case 24 75252 Paris Cedex 05 France

19  
20   \*Corresponding author

21

1 **Abstract**

2 **Axial elongation is a widespread mechanism propelling the generation of the**  
3 **metazoan body plan. A widely accepted model is that of posterior growth,**  
4 **where new tissue is continually added from the posterior unsegmented tip of**  
5 **the body axis. A key question is whether or not such a posterior growth zone**  
6 **generates sufficient additional tissue volume to generate elongation of the**  
7 **body axis, and the degree to which this is balanced with tissue convergence**  
8 **and/or growth in already segmented regions of the body axis. We applied a**  
9 **multi-scalar morphometric analysis during posterior axis elongation in**  
10 **zebrafish. Importantly, by labelling of specific regions/tissues and tracking**  
11 **their deformation, we observed that the unsegmented region does not**  
12 **generate additional tissue volume at the caudal tip. Instead, it contributes to**  
13 **axis elongation by extensive tissue deformation at constant volume. We show**  
14 **that volumetric growth occurs in the segmented portion of the axis and can be**  
15 **attributed to an increase in the size and length of the spinal cord and**  
16 **notochord. FGF inhibition blocks tissue convergence within the tailbud and**  
17 **unsegmented region rather than affecting volumetric growth, showing that a**  
18 **conserved molecular mechanism can control convergent morphogenesis,**  
19 **even if by different cell behaviours. Finally, a comparative morphometric**  
20 **analysis in lamprey, dogfish, zebrafish and mouse reveal a differential**  
21 **contribution of volumetric growth that is linked to a switch between external**  
22 **and internal modes of development. We propose that posterior growth is not a**  
23 **conserved mechanism to drive axis elongation in vertebrates. It is instead**



1 **associated with an overall increase in growth characteristic of internally**  
2 **developing embryos that undergo embryonic development concomitantly with**  
3 **an increase in energy supply from the female parent.**

4

## 5 **Introduction**

6 Axial elongation is a widespread mechanism propelling the generation of the  
7 metazoan body plan (Martin and Kimelman, 2009). A widely accepted model for  
8 posterior body elongation is that of posterior growth, where new tissue is continually  
9 added from the posterior tip of the elongating body axis. In vertebrates, a posterior  
10 proliferative zone is thought to drive this process by providing new cells to populate  
11 the posterior tissues, the mesoderm and spinal cord in particular (Beddington, 1994;  
12 Bouldin et al., 2014; Cambrey and Wilson, 2002; Mathis and Nicolas, 2000; McGrew  
13 et al., 2008; Nicolas et al., 1996; Selleck and Stern, 1991). However, in order to  
14 contribute to the elongation of the posterior body, this growth zone must generate a  
15 significant increase in volume at the whole embryo level. Therefore, volumetric  
16 measurements are required to determine whether this posterior proliferative zone  
17 generates sufficient volume increase to elongate the posterior body. Several lines of  
18 evidence suggest that cell proliferation is not strictly required for axis elongation. The  
19 zebrafish *emi1* mutant, in which cell divisions are blocked from the beginning of  
20 gastrulation (Riley et al., 2010; Zhang et al., 2008) is not truncated but only  
21 shortened by around 30%. Blocking of cell division with the use of mitomycin C and  
22 aphidicolin failed to affect elongation rate in the chick embryo (Bénazéraf et al.,  
23 2010). Furthermore, a role for proliferation in driving elongation has been challenged

1 in other morphogenetic processes, for example during mouse limb bud outgrowth  
2 (Boehm et al., 2010).

3

4 In addition to cell proliferation, several other cell behaviours may contribute to  
5 growth, (i.e. an increase in tissue volume). A model has been proposed in the chick  
6 whereby a gradient of random cell motility generates elongation by decreasing  
7 cellular density within the caudal region of the presomitic mesoderm (PSM)  
8 (Bénazéraf et al., 2010). In addition, several other cell behaviours such as cell  
9 swelling or an increase in extra-cellular matrix production may also be contributing to  
10 growth. To incorporate all potential cellular behaviours that could contribute to  
11 growth, morphometric measurements at the whole structure level are required to  
12 assess degree of volume increase that may or may not be concurrent with axis  
13 elongation.

14

15 In addition to volumetric growth, several non-growth cell behaviours have also been  
16 proposed to drive elongation via tissue convergence, particularly in anamniote  
17 embryos such as zebrafish. Gastrulation-like cell rearrangements such as  
18 convergence-extension, together with novel cellular movements have been observed  
19 in zebrafish posterior elongation (Kanki and Ho, 1997). Also, blocking FGF signalling  
20 leads to an inhibition of cellular flow in the tailbud and the disruption of axis  
21 elongation (Lawton et al., 2013). In addition, as the presumptive territory for the  
22 posterior body has not yet been mapped, it could be that further convergence of cells  
23 from domains lateral to the tailbud also contributes to the elongation of the posterior

1 axis. However, while these studies point for a clear role of cell rearrangements, they  
2 do not rule out an additional role for volumetric growth during axial elongation in  
3 zebrafish.

4  
5 We aim to determine the relative contribution of volumetric growth vs. tissue  
6 deformation (i.e. elongation in the absence of volume increase) to posterior body  
7 elongation. As the zebrafish embryo develops externally, with only a limited energy  
8 supply in the form of a relatively small yolk sack, a second aim is to assess the  
9 degree of growth that is concomitant with posterior body elongation internally  
10 developing mouse and dogfish embryos that develop with increased maternal energy  
11 supply compared with externally developing zebrafish and lamprey embryos.

12  
13 We first generated a fate map of the zebrafish posterior body and found a  
14 considerable contribution of cells directly into both the spinal cord and PSM without  
15 having first transitioned through the tailbud. Our morphometric analysis conducted  
16 throughout elongation at different length-scales (i.e. whole posterior body,  
17 segmented vs unsegmented regions and individual tissues) revealed that axis  
18 elongation occurs via tissue convergence, initially in the absence of volume increase.  
19 The photolabelling and tracking of the unsegmented region shows that there is no  
20 posterior growth in zebrafish elongation. Whole structure and tissue specific  
21 photolabels then revealed that growth does occur at later stages within the notochord  
22 and spinal cord. FGF inhibition blocks tissue convergence within the tailbud and  
23 PSM rather than controlling posterior growth. Comparing two internally developing

1 (mouse and dogfish) and two externally developing vertebrates (the zebrafish and  
2 lamprey), we find that posterior growth is not a conserved process in vertebrates, but  
3 is instead correlated with an internal mode of development.

4

## 5 **Results**

### 6 **The prospective posterior body is not restricted to the tailbud region.**

7 In the zebrafish, the embryonic axis is already established by the late gastrula with  
8 the head at the anterior pole. At this stage the prospective anterior trunk somites (1-  
9 12) are already present within the unsegmented pre-somitic mesoderm (Kanki and  
10 Ho, 1997; Kimmel et al., 1995). Subsequently, the remaining 20 segments of the  
11 body form in an anterior to posterior fashion through the process of posterior axis  
12 elongation. Previous studies analysing the role of cell movements in driving axial  
13 elongation in the zebrafish have focused on cells within the tailbud (Kanki and Ho,  
14 1997; Lawton et al., 2013). However the limits of the posterior body territory are  
15 unknown from the end of gastrulation up to the 12-somite stage. We therefore  
16 mapped the limits of the prospective posterior body between the end of gastrulation  
17 and 12-somite stage. We generated 12 independent movies in which clusters of 10-  
18 20 cells were photolabeled with the use of a nuclear localised KiKGR construct (S1  
19 Movie), a photoconvertible fluorescent protein that switches from green to red upon  
20 UV exposure (Hatta et al., 2006). This allowed us to track these cells and determine  
21 their fate with respect to the posterior body and tailbud. We observed that cells  
22 coming from domains lateral to the tailbud converge and are incorporated into the  
23 tailbud (blue; Fig. 1A-C). In addition, we found that many cells entered directly into

1 both the spinal cord (yellow; Fig1A-C) and pre-somitic mesoderm (PSM; red; Fig. 1A-  
2 C) without having passed through the tailbud region (blue; Fig. 1A-C) (S1 Movie).  
3 This suggests that the prospective posterior body region at late gastrula stages is  
4 much larger than previously thought and not restricted to the tailbud region, which  
5 prompted us to examine the degree to which growth (i.e. volume increase) versus  
6 convergence is contributing to the elongation of the posterior body axis in zebrafish.

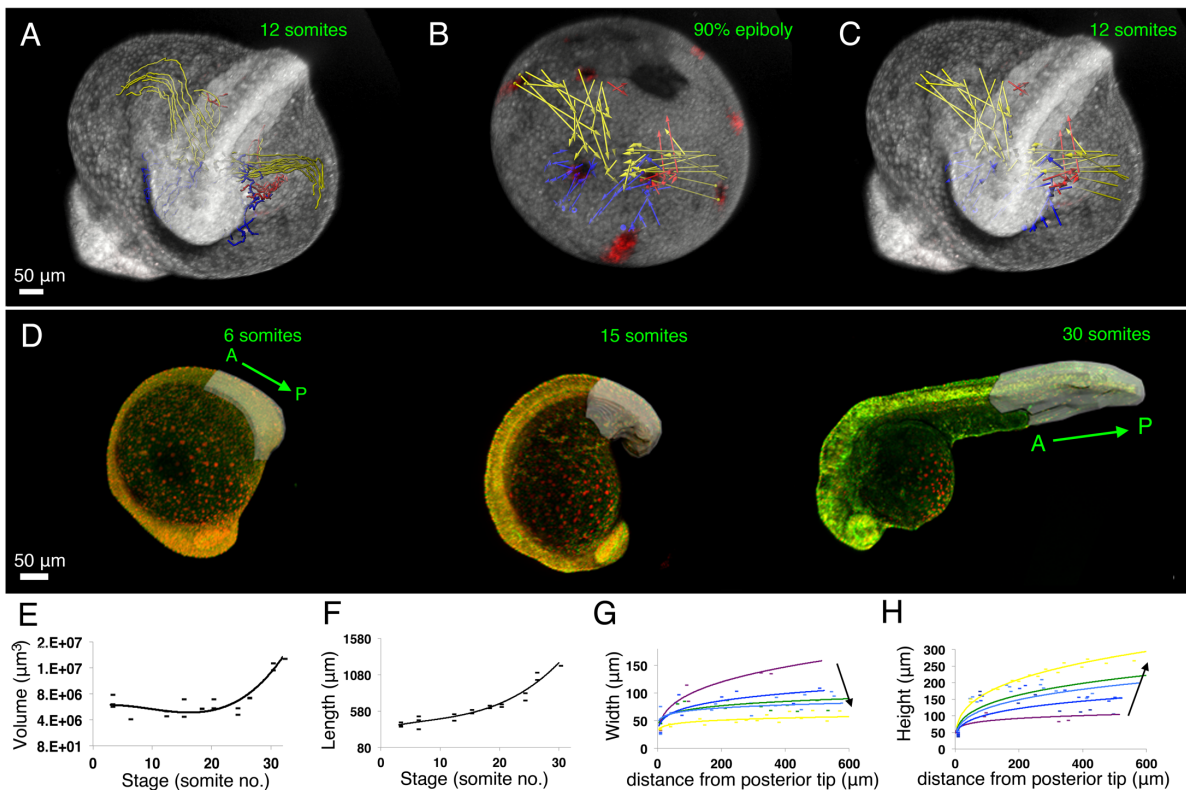

7

8

9 **Figure 1. Posterior axis elongation in zebrafish occurs firstly in the absence of growth**

10 **followed by a later growth phase.**

11 (A-C) Tracks (A) and displacement vectors (B,C) of spinal cord (yellow) tailbud (blue) and PSM (red)  
12 precursors from automated tracking of photolabeled nuclear from the 90%epiboly to the 12 somite  
13 stage in order to determine lateral edges of the prospective posterior body axis. (D) Taking the 12<sup>th</sup>  
14 somite as the trunk/tail boundary, surface reconstructions (grey region) were created at consecutive

1 stages through axial elongation. Embryos shown in lateral view with A and P marking anterior and  
2 posterior poles of the posterior body. (E-H) Plots of morphometric measurements of volume (E;  
3 polynomial fit,  $r^2 = 0.83$ ,  $n=21$ ) and length (F; polynomial fit,  $r^2 = 0.94$ ,  $n=21$ ) against time (expressed as  
4 total number of somites formed). (G-H) Plots of width (G) and height (H) against distance from  
5 posterior tip of the tail to where each measurement was taken (colour code: purple= 12 somites (s)  
6 ( $n=5$ ), dark blue= 15s, light blue= 18s ( $n=7$ ), green= 20s ( $n=12$ ), yellow= 24s ( $n=17$ ). Data points show  
7 individual measurements,  $n$ =total number of measurements from 3 embryos per stage.  
8

9 **Posterior axis elongation in zebrafish occurs through extensive convergence,**  
10 **initially in the absence of growth followed by a later growth phase.**

11 To decipher the modalities of zebrafish posterior body elongation, we performed a  
12 dynamic morphometric analysis at the whole structure level. Using this early fate  
13 map and samples fixed from 12-somite stage on, we built 3D surface reconstructions  
14 of the posterior body throughout the process of axis elongation (Fig. 1A; S2 Movie).  
15 From these, we extracted quantitative information on volume, length, width and  
16 height changes. Surprisingly, despite a continuous elongation of the posterior body  
17 from early stages (Fig 1C), we did not observe an increase in volume until the 24-  
18 somite stage (Fig 1B). To generate axis elongation in the absence of growth, tissues  
19 must decrease in either width or height at early stages. We observe that during the  
20 initial stages of posterior body elongation (purple to yellow lines in Fig. 1D, E), there  
21 is a four-fold decrease in width (Fig. 1D). This contrasts with the posterior body  
22 height, which increases throughout elongation, suggesting that convergence is  
23 contributing both to an increase in length and height (Fig 1E). These results  
24 demonstrate that whilst growth may contribute to axial elongation from the 24 somite

1 stage onwards, much of the early stages of posterior body elongation are driven by  
2 convergence.

3

#### 4 **The zebrafish posterior axis does not elongate by posterior growth.**

5 We next wanted to determine in zebrafish whether the posterior axis elongates by  
6 addition of tissue at its posterior end (i.e. posterior growth). Such a mode of  
7 elongation implies that the volume of tissue generated by the posterior tip should  
8 increase over time. We thus labelled the posterior tip of the embryonic axis that has  
9 not yet undergone segmentation by somitogenesis (the unsegmented region) and  
10 followed its growth over time. We took embryos previously injected with mRNA  
11 encoding cytoplasmic Kikume Green to Red (KikGR). Illuminating the unsegmented  
12 region with UV at the 15-somite stage results in the labelling of all cells within this  
13 region and their descendants. We then performed time-lapse imaging of the  
14 unsegmented region photolabels (Fig. 2A, S3 Movie). We tracked the photolabels for  
15 a period of five hours, as at later stages unsegmented derivatives have progressed  
16 significantly into the segmented portion of the body axis. Automatic thresholding of  
17 the photoconverted signal allows us to obtain continuous morphometric information  
18 on the relative volume and shape changes of these regions and their derivatives  
19 over time. As cells are exiting the tailbud and entering the PSM, we saw  
20 considerable mixing of labelled cells with unlabelled cells of the rostral PSM. As this  
21 cell mixing may contribute to elongation via cell intercalation, we took for our length  
22 measurements the most anterior photolabeled cell. For volume measurements, we  
23 segmented and measured the photoconverted (i.e. red) signal only. Although the

1 unsegmented region of the posterior body contributes to elongation (unsegmented:  
2 2.67 fold increase; Fig. 2B), this region does not increase in volume (0.98 fold  
3 change; Fig. 2C). In order to determine whether the unsegmented region contributes  
4 any growth to posterior body elongation during the growth phase, we photolabelled  
5 at the 21-somite stage and measured its morphogenesis through to the completion  
6 of somitogenesis (Fig. 2D). This confirmed the absence of unsegmented region  
7 growth during the late stages as well (Fig. 2F). However, this region continues to  
8 contribute to posterior body elongation at these late stages, although to a lesser  
9 extent (Fig. 2E; 1.61 fold increase). Thus, no tissue growth from the unsegmented  
10 region is observed during posterior body elongation in zebrafish.  
11

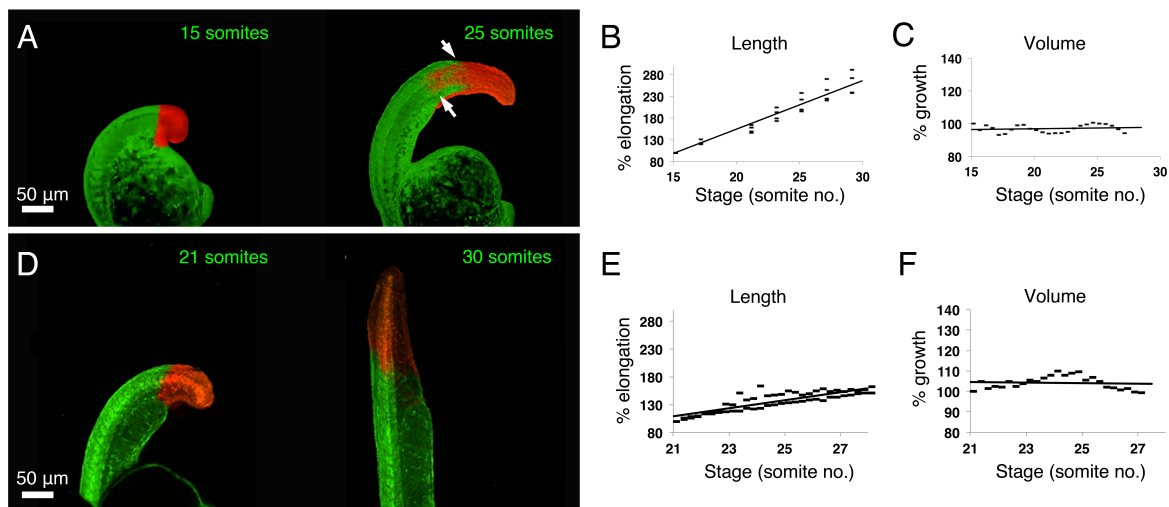

12

13

14 **Figure 2. The zebrafish posterior axis does not elongate by posterior growth.**

15 (A, D) Stills from time-lapse movies of embryos injected at the one cell stage with Kikume mRNA and  
16 regions of the posterior body photo-labelled in the unsegmented at the 15 somite (A) or the 21 somite  
17 stage (D). All embryos shown in lateral view with posterior to the top and anterior to the bottom. (B, E)  
18 Photoactivated region length (% of final length) plotted against time (number of somites formed),



1 n(B)=25, n(E)=51. (C, F) Photoactivated region volume (% of final volume) plotted against time  
2 (number of somites formed), n(C)=25, n(F)=25. Note that photolabels in the unsegmented region do  
3 not increase in volume at either stage (C,F). White arrows in (A) indicate the displacement of labels  
4 within the somitic mesoderm (lower arrows) relative to the spinal cord (upper arrows). Data points  
5 show individual measurements, n=total number of measurements from 3 embryos per experiment.

6

## 7 **The segmented region contributes to elongation via both lengthening and** 8 **growth**

9 During posterior body elongation, growth is happening at the whole structure level  
10 but not in the unsegmented region. We thus tested whether the segmented region  
11 exhibited growth. We performed again the photolabel experiment described in Fig. 2  
12 but this time at the level of the segmented region. Unlike the unsegmented region,  
13 the segmented region does undergo both elongation (2.19 fold increase, Fig. 3B)  
14 and growth (1.25 fold increase, Fig. 3C). Anterior growth occurs in already  
15 segmented regions where tissue differentiation is occurring. Importantly, these  
16 differences in growth between unsegmented and segmented regions are mirrored by  
17 a rapid decrease in cell proliferation within the unsegmented region relative to more  
18 anterior structures (Bouldin et al., 2014); (S4 Figure). Overall, these indicate that the  
19 segmented region of the body axis grows at least in part by increasing its cell  
20 numbers whereas the unsegmented mesoderm elongates via cell rearrangements in  
21 the absence of tissue growth.

22

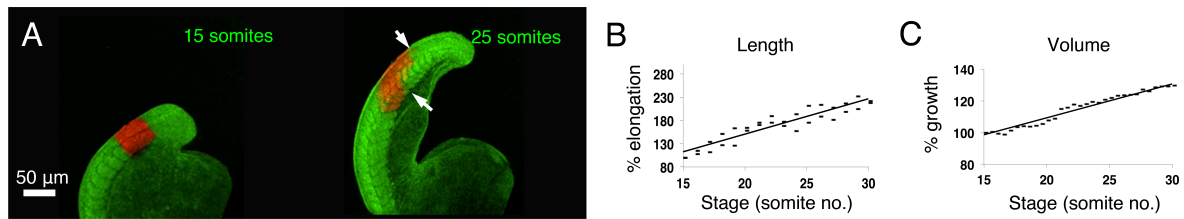

**Figure 3. The segmented region contributes to elongation via both lengthening and growth**

(A) Stills from time-lapse movies of embryos injected at the one cell stage with KikGR mRNA and the segmented region of the posterior body photo-labelled at the 15 somite stage. All embryos shown in lateral view with posterior to the top and anterior to the bottom. (B) Photoactivated region length (% of final length) plotted against time (number of somites formed; n(B)= 29). Photoactivated region volume (% of final volume) plotted against time (number of somites formed; n(C)=31. White arrows in (A) indicate the displacement of labels within the somitic mesoderm (lower arrows) relative to the spinal cord (upper arrows). Data points show individual measurements, n=total number of measurements from 3 embryos per experiment.

**Differential tissue contributions to both growth and convergence and extension.**

We noticed that regions photolabelled in the unsegmented domain progressed further anteriorly into the pre-somitic mesoderm (Fig. 2A; lower white arrow) as compared to into the spinal cord (Fig. 2A; upper white arrow). The converse was observed for labels in the segmented region, which result in spinal cord cells extending more posteriorly into the tail than cells that were labelled in the somites (Fig. 3A; white arrows). These observations are suggestive of differential contributions of both spinal cord and somitic tissues to growth and/or convergence and extension. To test this further, we photo-labelled small regions of tissue within the tailbud, the pre-somitic mesoderm (PSM), somites and spinal cord (Fig. 4A-C).

1 This analysis allows us to make a quantitative comparison of the contribution of  
2 these tissues to growth by plotting the percentage volume increase over time (Fig.  
3 4D). In addition, we analysed the contribution of each tissue to convergence and  
4 extension by plotting the length:width ratio against time for each structure (Fig. 4E).  
5 The spinal cord contributes the most to growth (Fig. 4B, D, blue). Importantly, cell  
6 proliferation is maintained in the spinal cord throughout elongation (S4 Figure). This  
7 tissue also has a large positive increase in the length:width ratio (Fig 4B,E; S5  
8 movie; blue), suggesting that either growth is anisotropic (through oriented cell  
9 division or oriented growth of the cells) or that additional cell rearrangements such as  
10 convergence-extension are leading to a thinning of this structure. The cells in transit  
11 from the tailbud to the PSM contribute the most to thinning and lengthening. They  
12 undergo the most dramatic increase in length:width ratio, but in the absence of  
13 growth (Fig 4C-E; S6 movie; green). Once cells have entered the PSM however, little  
14 further thinning and lengthening occurs (Fig. 4B,E; S5 movie; yellow). This tissue  
15 also undergoes a slight compaction during somite formation (Fig. 4B,D; yellow).  
16

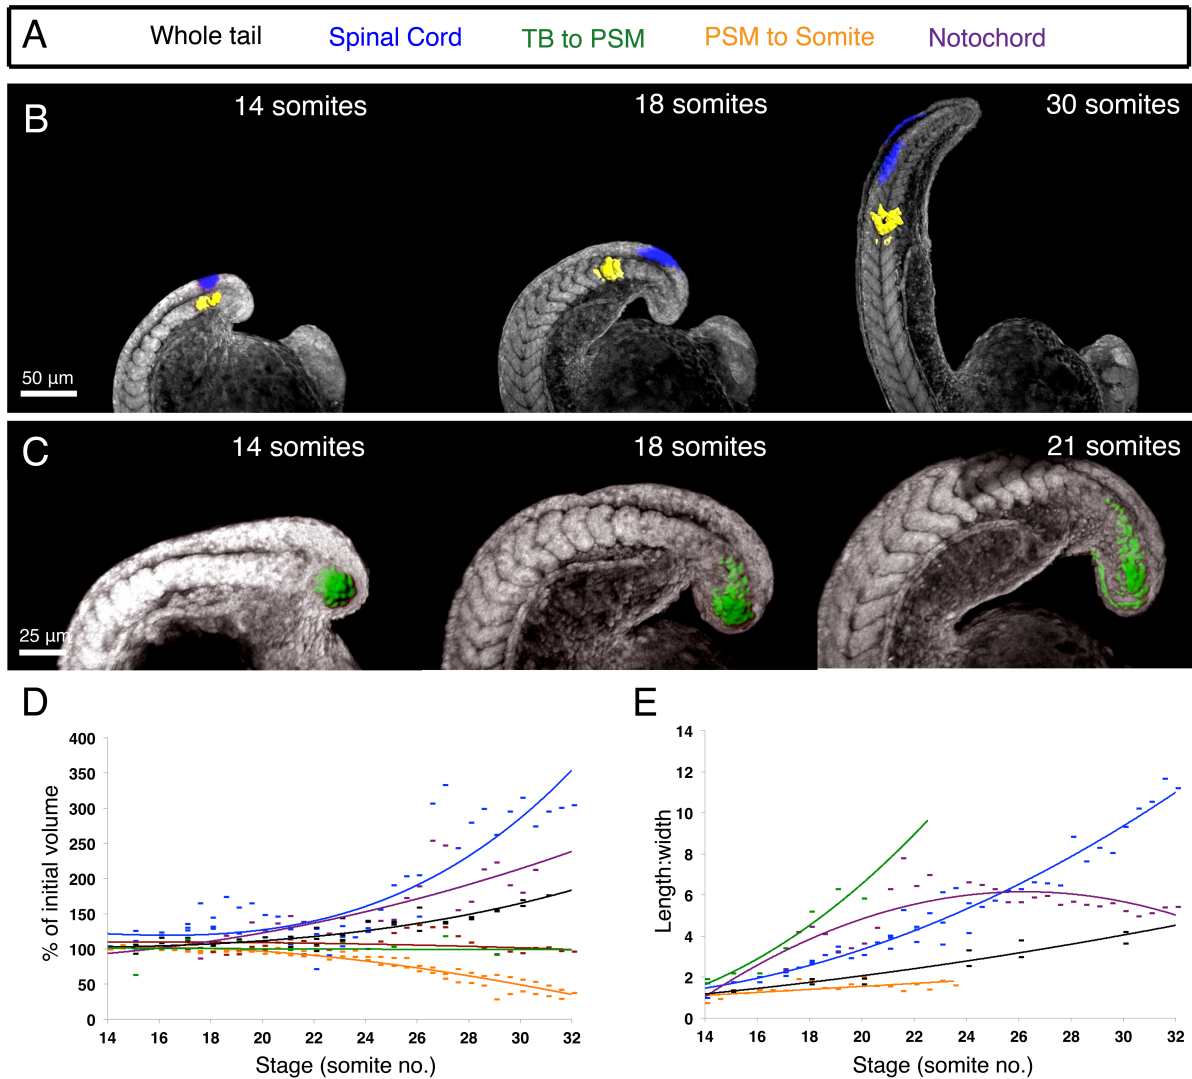

1  
2 **Figure 4. The spinal cord and notochord are the principal contributors to anterior growth and**  
3 **the TB to PSM transiting cells to thinning and lengthening.** (A) Different tissues are colour coded  
4 according to the key shown. (B) Stills from time-lapse movies of embryos injected at the one cell  
5 stage with a Kikume and photo-labelled in the spinal cord and as cells transition from the PSM to  
6 newly formed somites. (C) Cells transitioning between the tailbud (TB) and pre-somitic mesoderm. (D,  
7 E) Plots of volume (D; n(Spinal cord)=51, n(notochord)=31, n(PSM to somites)=58, n(TB to PSM)=23)  
8 and length:width (E; n(Spinal cord)=43, n(notochord)=30, n(PSM to somites)=17, n(TB to PSM)=12)  
9 of each photo-labelled region against time (expressed as total number of somites formed). Data points  
10 show individual measurements, n=total number of measurements from 3 embryos per experiment.

1

2 In addition to growth in the spinal cord, it is known that inflation of the notochord by  
3 the formation of fluid-filled organelles has an important role in the elongation of the  
4 zebrafish axis (Ellis et al., 2013). In line with this, we observe a considerable degree  
5 of volume increase in notochord photolabels (Fig. 4D). This is mirrored by the  
6 increase in the volume of bounding-boxes surrounding notochord photo-labels (Fig.  
7 4D; purple; includes the organelle volume) without a corresponding increase in the  
8 volume of the KikGR-labelled cytoplasm (Fig. 4D; magenta; excludes the organelle  
9 volume). In addition to inflation and proliferation, the notochord also undergoes  
10 convergence and extension (Glickman et al., 2003), which is mirrored by an increase  
11 in length:width (Fig. 4E; purple). However, as cells begin to inflate, they do so in all  
12 directions, leading to a later decrease in length:width ratio (Fig. 4E; purple).

13

14 The impact of these distinct tissue deformations on the elongation of the body axis  
15 as a whole will depend on their initial size with respect to the whole body axis, as a  
16 large volume increase in a small tissue may not contribute much to the  
17 morphogenesis of the whole structure. To investigate this, we segmented the  
18 paraxial mesoderm, spinal cord and notochord at the 15-somite stage and measured  
19 their volume as a proportion of the posterior body volume (S7 Figure). The paraxial  
20 mesoderm makes up the largest portion of the axis, at approx. 23% (S7 Figure), thus  
21 the convergence of this tissue is likely a major contributor to axis elongation. The  
22 spinal cord also forms a significant proportion of the zebrafish axis (12%; S7 Figure)  
23 and therefore growth and convergence of this tissue is an additional major

1 contributor to axis elongation. The notochord, at 1.9% of the whole posterior body  
2 axis is also likely to contribute although to a much lesser extent than the other  
3 tissues. The remaining approx. 63% of the posterior body consists of inter-tissue  
4 components, the non-neural ectoderm and endodermal tissues which all may be  
5 contributing to differing extents to axis elongation.

6

7 **FGF signalling is only required for convergence and extension, not growth of**  
8 **the zebrafish posterior body.**

9 FGF has been shown to be important for zebrafish posterior elongation [14] and  
10 studies in amniotes suggest that FGF is required to generate posterior growth  
11 (Bénazéraf et al., 2010; Bouldin et al., 2014; del Corral and Storey, 2004; Olivera-  
12 Martinez et al., 2012). Therefore, we applied our morphometric method to test the  
13 role for FGF in generating elongation in zebrafish where there is no posterior growth.  
14 To circumvent effects on mesoderm induction and patterning as a consequence of  
15 inhibiting FGF signalling prior to the end of gastrulation, we made use of known  
16 inhibitors of FGF receptors: SU5402 and PD173074. Addition of these drugs at the  
17 10-somite stage and examination at the 32-somite stage lead to clear affects on  
18 posterior axis morphology (Fig. 5A-D), however segments were still present, allowing  
19 us to perform surface 3D surface renderings of the posterior axis region. Neither  
20 treatment affected posterior axis volume when compared to DMSO treated controls  
21 (Fig. 5E,  $p>0.7$  in all cases). However, we did see a significant reduction in axis  
22 length (Fig. 5F,  $p<0.01$ ). This coincided with an increase in mean width (Fig. 5G,  
23  $p<0.01$ ), suggesting that an inhibition of convergence and extension is the principle

1 cause of axis shortening upon inhibition of FGF signalling. To test this we next  
2 repeated our small photo-labellings of the tailbud in both embryos cultures in DMSO  
3 (Fig. 5H) and together with PD173074 (Fig 5I) and monitored their transition into the  
4 unsegmented region by time-lapse microscopy. No effect was observed on the  
5 volume of the tailbud photo-labelled cells upon addition of PD173074 (Fig. 5J),  
6 however we did observe an inhibition of the length:width ratio increase that is  
7 normally observed for these cells (compare red to green lines in Fig. 5K). Taken  
8 together, these results demonstrate that the principle role of FGF in posterior axis  
9 elongation in the zebrafish is to control tissue convergence as cells exit the tailbud  
10 and enter the PSM.



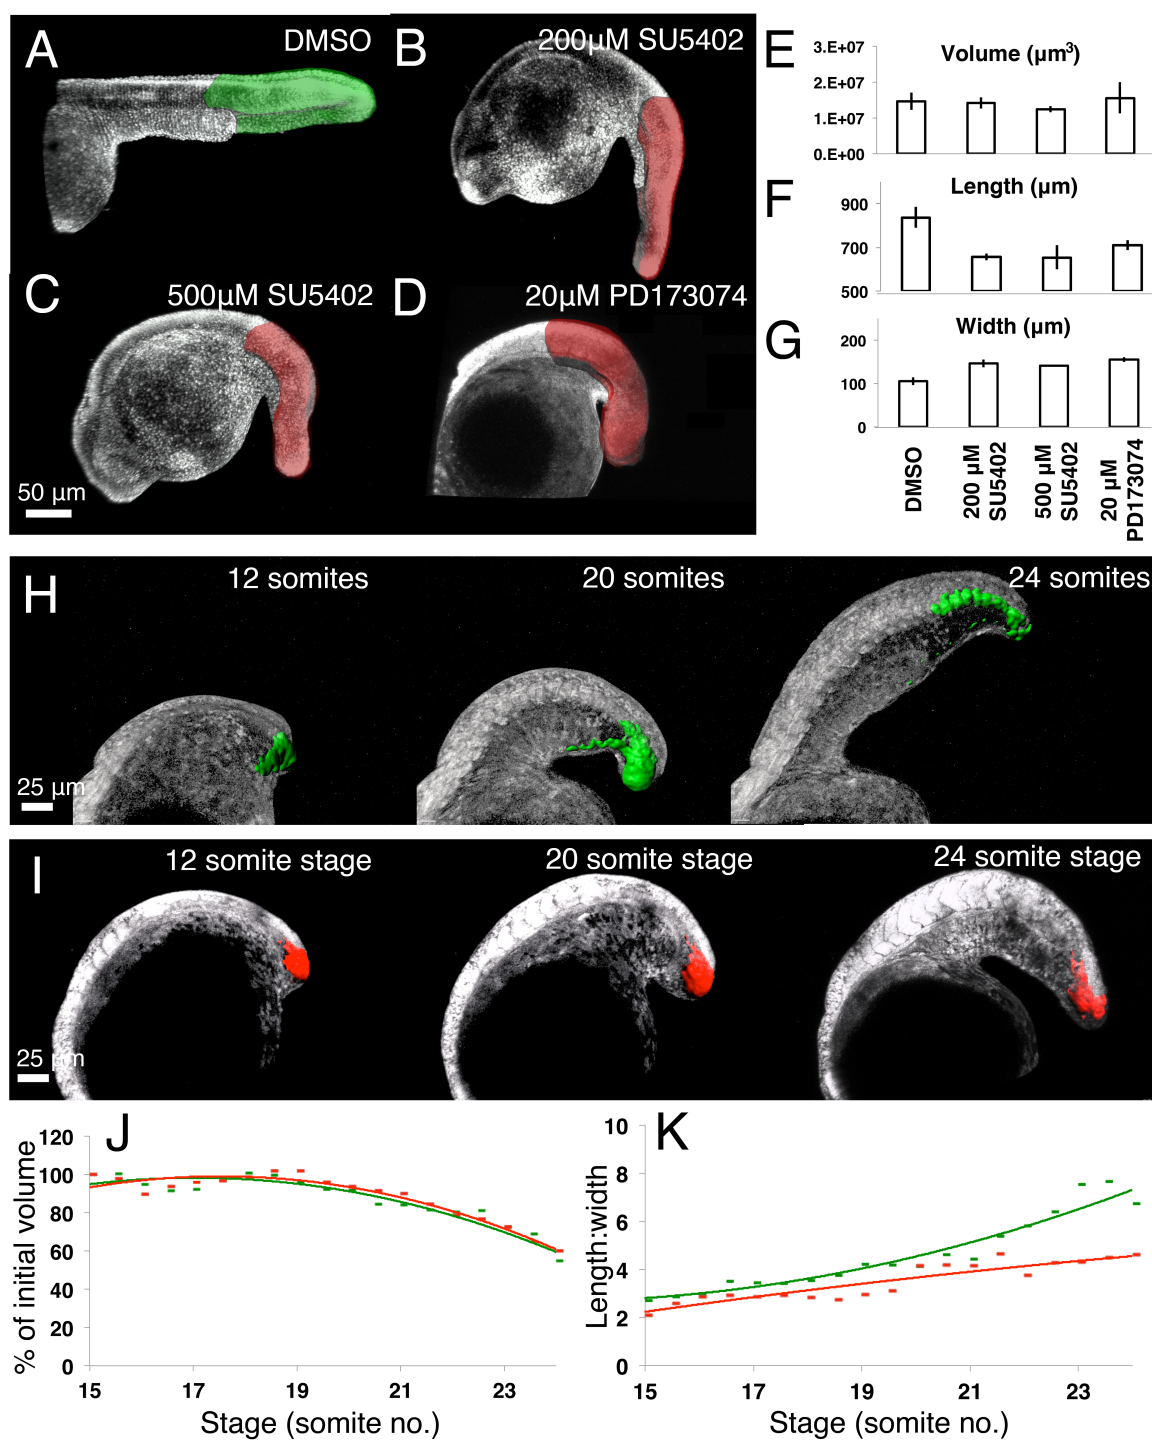

1

2

3 **Figure 5. FGF signalling is required for thinning and lengthening not growth of the zebrafish**

4 **posterior body.** (A-D) Embryos were incubated in either 500  $\mu$ M DMSO (A), 200  $\mu$ M SU5402 (B),



1 500 $\mu$ M SU5402 (C) or 20 $\mu$ M PD173074 (D) from the 10 somite stage until the 32 somite stage and  
2 imaged by confocal microscopy. This allowed for the segmentation of the posterior axis and  
3 measurement of volume (E), length (F) and width (G) for each condition. (H-I) Stills from time-lapse  
4 movies of embryos in which small regions of cells within the tailbud are photolabelled and tracked  
5 until their entry into the somitic mesoderm in the presence of 500 $\mu$ M DMSO (H) and 20 $\mu$ M PD173074  
6 (I). This allowed for the quantification of volume (J) and length:width (K) over time. Green lines  
7 correspond to the control situation, red lines indicate treatment with PD173074.

8

9 **Posterior growth is not a conserved developmental mechanism across**  
10 **vertebrates.**

11 The absence of posterior growth in zebrafish is striking and prompted us to examine  
12 the degree of volume increase that occurs in unsegmented vs. segmented portions  
13 of the body axis in a wider range of vertebrates (Fig. 6E). In particular, we were  
14 interested to determine whether the lack of posterior growth in zebrafish was  
15 characteristic of the external development of anamniote embryos. Therefore we  
16 compared our morphometric measurements in zebrafish (Fig. 6C) to the amniote  
17 mouse embryo (Fig. 6D) and to a basal anamniote vertebrate, the lamprey (Fig. 6A).  
18 As a further comparison, we analysed the anamniote dogfish that is evolutionarily  
19 basal to teleost fish (Fig. 6E). Importantly however, these embryos develop internally  
20 within an egg case and together with a large yolk supply. Thus, posterior growth in  
21 this animal would argue for a direct relationship between an increased maternal  
22 energy supply and posterior growth, rather than for a later evolution of posterior  
23 growth in amniotes.

24

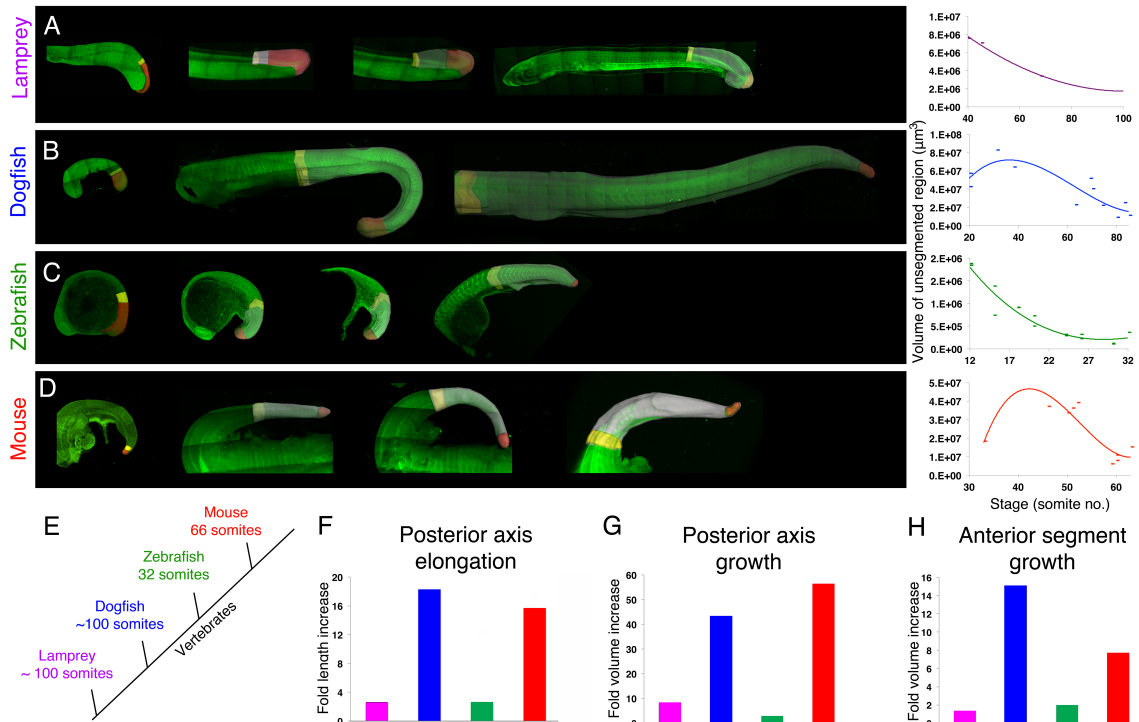

1  
2  
3  
4  
5  
6  
7  
8  
9  
10  
11  
12  
13  
14

**Figure 6. Comparative 4D morphometric analysis of posterior body elongation across**

**vertebrates.** (A-D) Maximal projections of tiled z-stacks of lamprey (A, n=7), dogfish (B, n=11),

zebrafish (C, n=15) and mouse (D, n=10) embryos at consecutive stages through posterior body

elongation. All embryos shown in lateral view with posterior to the right. Grey regions show the entire

segmented posterior body, yellow regions show the two most anterior body segments and the red

region shows the posterior-most unsegmented region. Corresponding plots of unsegmented region

volume over time (in somite number) are shown to the right. (E) Simplified phylogeny for each species

studied together with total somite number. (F) Fold change in length (bars, left hand scale) and

elongation rate (fold length increase/time (hours); crosses, right hand scale) for each species. (G,H)

Fold change in volume of whole posterior body axis and anterior segments (H). Purple bar= lamprey,

blue= dogfish, green= zebrafish, red= mouse.

1 Both dogfish and mouse embryos showed an initial increase in unsegmented region  
2 volume at early stages that is consistent with the production of additional tissue from  
3 a posterior growth zone (Fig. 6B,D). As expected for the lack of unsegmented region  
4 growth in zebrafish, this region undergoes a continual reduction in volume  
5 throughout the elongation of the posterior axis, as tissue is continuously being  
6 segmented in the anterior with no additional tissue being produced from the tailbud  
7 (Fig. 6C). A similar continual reduction is observed in lamprey, suggestive of a null or  
8 limited contribution of unsegmented region growth in this basal vertebrate (Fig. 6A).  
9 The unsegmented region growth in mouse and dogfish is mirrored by a high level of  
10 axis elongation (Fig. 6F) and overall growth (Fig. 6G).

11

12 To compare the degree to which segmented region growth contributes to axial  
13 elongation, we measured the volume of the two most anterior segments between  
14 species (shaded yellow in Fig. 6A-D). This revealed that anterior growth is occurring  
15 in all species, albeit at different intensities that correlate with the intensity of the  
16 overall growth and elongation (Fig. 6H). Importantly, the fold increase in anterior  
17 segments is much lower than that of the overall posterior body (15.0 compared to  
18 40.6 for dogfish; 7.7 compared to 56.1 for mouse), suggesting that much of the  
19 overall growth in these two organisms is indeed produced from the posterior  
20 unsegmented tissue. Taken together, these results demonstrate that whilst  
21 unsegmented region growth plays a major role in the elongation of the posterior body  
22 axis of both mouse and dogfish embryos, posterior body elongation in both lamprey  
23 and zebrafish embryos occurs largely in the absence of unsegmented region growth.

## 1 **Discussion.**

### 2 **Multi-tissue contribution to posterior body elongation in zebrafish**

3 Our multi-scalar morphometric analysis allows for several conclusions to be drawn  
4 relating to the differential tissue contribution to posterior axis elongation in zebrafish.  
5 Firstly, whilst no additional volume is generated from the posterior unsegmented  
6 portion of the axis, convergence of this region is observed as cells transit from the  
7 tailbud into the PSM. Secondly, volume increase in the anterior segmented portion of  
8 the axis is correlated with an increase in the size of both the spinal cord and  
9 notochord. The observation that the anterior segmented region of the axis may be a  
10 major contributor to axial elongation explains the bi-phasic growth curve that is  
11 observed at the level of the structure as a whole (Fig. 1B). At early stages, the spinal  
12 cord and notochord growth, although occurring in anterior trunk structures, have not  
13 yet begun to occur within the posterior body. However, convergence and extension  
14 of cells entering the PSM is well underway, resulting in a thinning and lengthening of  
15 the posterior body axis in the absence of growth (Fig. 1B,E). At later stages, the dual  
16 processes of spinal cord growth and notochord inflation have reached the posterior  
17 body, resulting in an overall increase in posterior body volume (Fig. 1B,E) and a  
18 relative displacement of somitic and spinal cord cells (Fig. 2A; white arrows).  
19 Additional cell behaviours such as cell rearrangement, cell shape change and  
20 orientated cell division must act together with this growth in order to drive the  
21 elongation of the embryonic axis. While our morphometric measurements preclude  
22 conclusions to be drawn at the cellular level, they do provide a framework in which to  
23 incorporate such observations and to enable the construction of a complete model of

1 this complex morphogenetic process. Once this is attained, it may then be possible  
2 to inhibit distinct cellular behaviours and to determine their role in driving axial  
3 elongation.

4

#### 5 **Origin of cells that make up the posterior body.**

6 We demonstrate that posterior growth is not occurring during zebrafish posterior  
7 body elongation. The concept of posterior growth is often linked to the presence of a  
8 tailbud-resident and self-renewing progenitor population (Beddington, 1994;  
9 Cambray and Wilson, 2002; Mathis and Nicolas, 2000; McGrew et al., 2008; Nicolas  
10 et al., 1996; Selleck and Stern, 1991) that generate the cells that will make up the  
11 posterior body. These cells have been proposed to exist in the zebrafish tailbud  
12 (Martin and Kimelman, 2012). Considering the lack of expansion of the unsegmented  
13 region, our results are consistent either with the absence of such cells or that they  
14 have limited impact on the process of posterior body elongation. In support of this is  
15 the *emi* mutant phenotype that shows an axis shortening and not a truncation (Riley  
16 et al., 2010; Zhang et al., 2008). In addition, the cell transplantation experiments  
17 reported in (Martin and Kimelman, 2012) did not generate long tailbud-anchored  
18 clones as would be expected from tailbud-resident, self-renewing stem cells  
19 (Tzouanacou et al., 2009). The existence of tailbud-resident, self-renewing stem cells  
20 thus awaits long-term clonal analysis, similar to what has been performed in the  
21 mouse (Tzouanacou et al., 2009). Consistent with the absence of significant growth  
22 contribution during axis elongation, our fate mapping shows that a large proportion of

1 the cells that will make up the posterior body come from regions lateral to the tailbud,  
2 and not from proliferation of tailbud cells.

3

#### 4 **Posterior growth is associated with internal developmental mode.**

5 The null or limited posterior growth in zebrafish and lamprey is in stark contrast to  
6 both the mouse and dogfish where we observe large amounts of volume increase in  
7 both unsegmented and segmented regions of the body axis. The dogfish embryo  
8 develops inside an egg case with a large yolk supply that is reminiscent of avian  
9 embryos (Sauka-Spengler et al., 2003), and the mouse embryo develops together  
10 with a large energy supply from the placenta. This is in contrast to the larval-feeding  
11 zebrafish that must first establish a full complement of posterior somites in order to  
12 swim and find food to grow. The prolarval lamprey also swims, before later  
13 undergoing a transition to filter feeding from the sediment in which they are buried  
14 during an extensive larval period. Therefore, growth appears to be associated with  
15 the increase in energy (either placental in the case of mammals or in the form of a  
16 large yolk supply in the case of birds and dogfish) that arises from an internal  
17 developmental mode. Whilst shape change behaviours are likely to contribute in all  
18 cases, an internal mode of development may have allowed for increased contribution  
19 of growth behaviours in embryos such as mouse and dogfish.

20

21 Despite these differences, there is a conservation of the role of both FGF and Wnt  
22 signaling pathway components and downstream Cdx and Brachyury transcription  
23 factors for posterior axis elongation across a range of vertebrates (Baker et al., 2010;

1 Esterberg and Fritz, 2009; Marlow et al., 2004; Row and Kimelman, 2009; Shimizu et  
2 al., 2005; Thorpe, 2005; Yang and Thorpe, 2011). *Brachyury* is also expressed in the  
3 tailbud during axis elongation in dogfish and lamprey embryos, which is further  
4 suggestive of a conservation in the expression of core posterior growth zone  
5 markers across vertebrates (Sauka-Spengler et al., 2003). Furthermore, *Brachyury*,  
6 *Wnt3*, *Wnt5* and *Wnt6* are present within the tailbud of amphioxus embryos  
7 (Schubert et al., 2001), considered to be the closest living relative of the chordate  
8 ancestor (Schubert et al., 2006). A growth zone driving body elongation has also  
9 been identified in several invertebrate embryos where it has been shown to be  
10 associated with Wnt signaling in spiders (McGregor et al., 2008), *Artemia* (Copf et  
11 al., 2004) and *Tribolium* (Bolognesi et al., 2008; Copf et al., 2004; Schulz et al.,  
12 1998). Altogether these observations have led to the proposal of the existence of a  
13 universally conserved posterior growth zone across metazoans (Martin and  
14 Kimelman, 2009). However, our results suggest that posterior growth is not a  
15 conserved mechanism to drive axis elongation in vertebrates. Thus, it is likely that  
16 observed conserved molecular mechanisms control different cellular behaviors  
17 according to different modes of elongation: they are required to direct cell fate  
18 decisions and/or to regulate cellular flow as cells exit the tailbud and/or to maintain a  
19 posterior growth zone. In the case of zebrafish, FGF signalling has switched from a  
20 role in posterior growth zone maintenance to a role in controlling the cell movements.  
21 This is supported by the observations that FGF is required to maintain cellular flow in  
22 zebrafish (Lawton et al., 2013) and that a late activation of a dominant negative FGF  
23 receptor does not result in the loss of *ntl* expression (Martin and Kimelman, 2010).

1

2 **Supplementary data**

3

4 **S1 Movie.** Example movie to determine posterior and lateral limits of the prospective posterior  
5 **body.**

6

7 **S2 Movie.** Example 3D reconstructions of the posterior body.

8

9 **S3 Movie.** Example of photolabelling in the unsegmented region of the posterior body

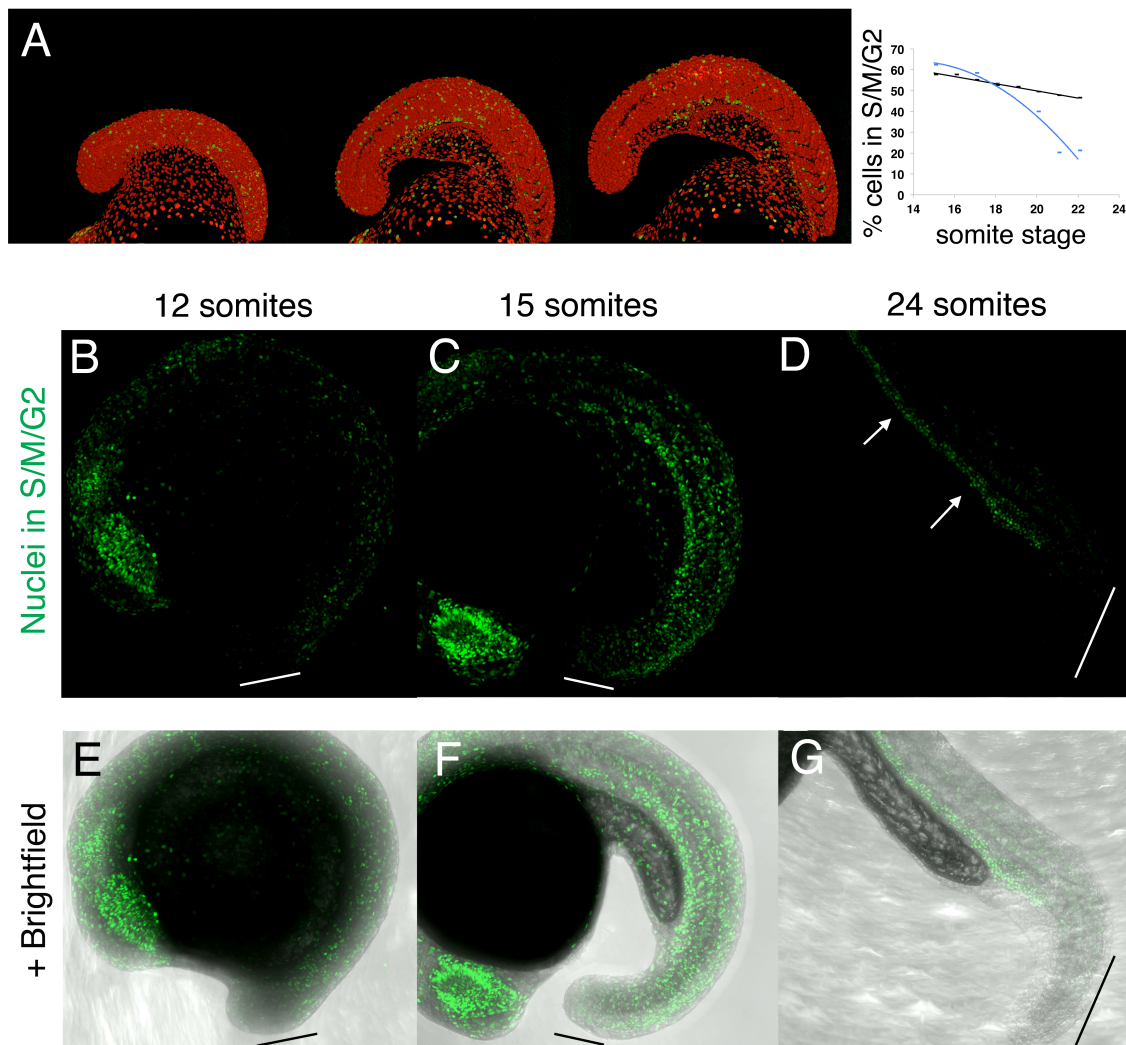

10



1 **S4 Figure. Cell divisions decrease rapidly in the tailbud region but continue into late stages in**  
2 **anterior structures.** A) Stills from a movie of Fucci embryos (Sugiyama et al., 2009) injected with  
3 nuclear mCherry to label all nuclei. Quantification of green nuclei vs. total nuclei as marked by  
4 mCherry reveals a gradual decline in cell divisions within the posterior body as a whole (black line),  
5 however cell divisions in the tailbud decrease much more rapidly (blue line). (B-G) Maximal  
6 projections of Fucci green embryos fixed at the 12 (B,E), 15 (C,F) and 24 (D,G) somite stages and  
7 imaged by confocal microscopy. Very few cells in S/M/G2 can be observed in the tailbud throughout  
8 the process of posterior body elongation (white lines indicate tailbud position in (B-C)). However cells  
9 continue to divide in more anterior structures. By the 24 somite stage, cell divisions are mostly  
10 restricted to blood precursors within the dorsal aorta (D, white arrows).

11 **S5 Movie. Example of photolabelling in spinal cord and pre-somitic mesoderm**

12

13 **S6 Movie. Example of photolabelling in tailbud as cells transition to the pre-somitic mesoderm**

14

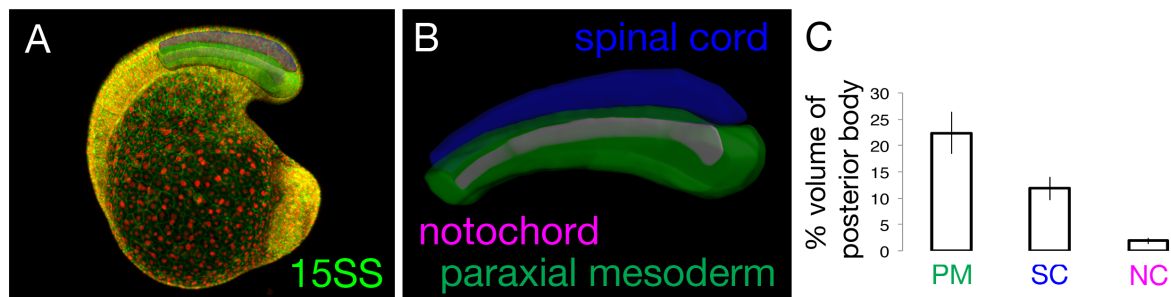

15

16 **S7 Figure. Relative proportional volumes of the spinal cord, paraxial mesoderm and**  
17 **notochord.** A-B) Confocal stacks of embryos at the 15SS were used to build surface reconstructions  
18 of the spinal cord (blue), paraxial mesoderm (green) and notochord (purple). C) Proportional volume  
19 of each tissue with respect to whole posterior body volume. Measurements are from three  
20 independent embryos.

21

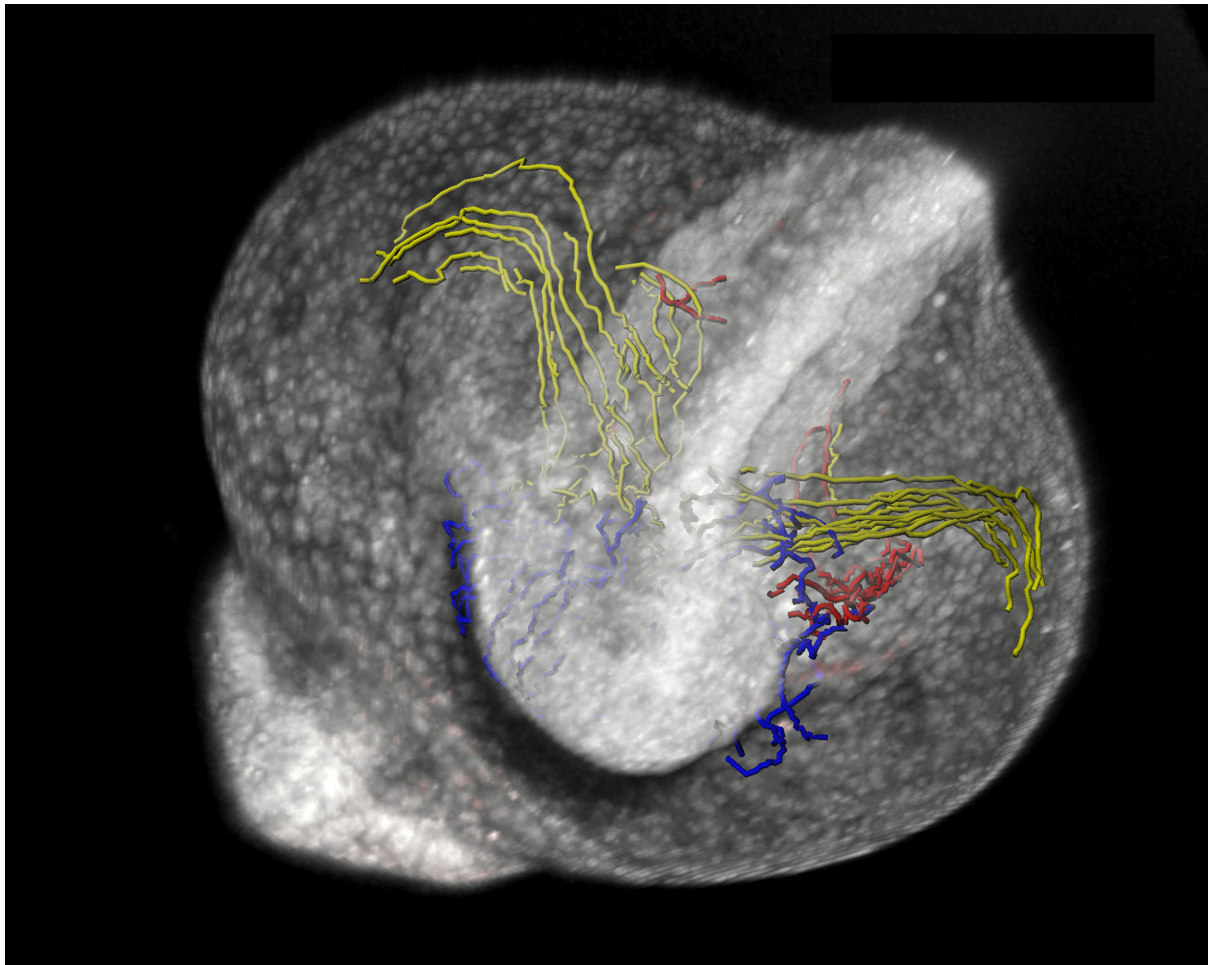

1

2 **Cover suggestion. This image shows the results of live cell tracking of posterior body**  
3 **contributions from 90% epiboly to the 12 somite stage.**

4

5

6

7

8

9

10

11

1

## 2 **Methods**

### 3 Preparation of zebrafish samples

4 Wild-type AB embryos were obtained from zebrafish (*Danio rerio*) lines maintained  
5 following standard procedures. Embryos were injected at the one-cell stage with  
6 either 500pg of Kikume RNA (Hatta et al., 2006), a nuclear targeted version of the  
7 construct (nls-Kikume; kind gift of Ian Scott) or with a 500pg nls-mCherry together  
8 with 500pg membrane-GFP. Embryos were raised at 28°C and staged according to  
9 number of somites. For live imaging, 12 somite stage embryos were embedded in a  
10 small drop of 1% low melting point agarose within the central glass ring of a glass-  
11 bottomed petri dish (Mattek; 35mm petri dish, 10mm micro well. No. 1.5 cover glass).  
12 The agarose surrounding the tailbud was then removed using a pulled capillary tube.

13

### 14 Cell tracking and mapping of tailbud boundary

15 Embryos previously injected with nls-Kikume were mounted at 90% epiboly in 1%  
16 low melting point agarose and imaged on an inverted Leica SP5 confocal  
17 microscope with a 20X air objective. Small regions of around 10 to 20 nuclei were  
18 photo-converted from green to red by exposing the cells to 10 200Hz scans of a 405  
19 laser at 60X zoom. Red nuclei were tracked in 4D using the image analysis tool  
20 Imaris (Andor technologies). The resulting tracks were filtered to include only long  
21 tracks lasting from 90% epiboly through to the 12 somite stage and manual corrected  
22 for tracking errors. The tracks were then colour coded depending on their final  
23 position at the 12-somite stage. Surface renderings of the entire embryo were

1 automatically segmented on the green channel using the 'surface' tool in Imaris, and  
2 reference points were added at 50 $\mu$ m intervals along the embryonic midline from the  
3 most dorsal part of the blastopore at the 3 somite and 6 somite stages. Two lines  
4 were measured from these reference points to tracks at a boundary between either  
5 the tail-fated cells and the non-axial epidermis, or between tail-fated cells and trunk-  
6 fated cells. 3- and 6-somite staged reference embryos previously imaged by light-  
7 sheet microscopy were used to map the full complement of boundary points with the  
8 use of midline reference points as described. Surface reconstructions of the  
9 prospective tail region from one half of the embryo were then created by manually  
10 drawing contours at 10 $\mu$ m intervals.

11

## 12 Volume segmentation and morphometric analysis

13 Segmentation of tail volumes was performed using the manually create surface  
14 function of Imaris. Contours were manually drawn around the edge of the posterior  
15 body at 10 $\mu$ m intervals in z, bordering on the last formed trunk somite boundary of  
16 each species (somite 12 for zebrafish, 33 for mouse, 40 for lamprey and 20 for  
17 dogfish (Richardson et al., 1998). Surface reconstructions were then automatically  
18 constructed using these contours, allowing for the extraction of volume  
19 measurements. Measurement points were placed at every other somite boundary  
20 along the axis, and the values summed to give the length of the axis at any given  
21 stage. Height and length measurements were made at each length measurement  
22 point and plotted as described in the main text.

23

1 For photolabelled experiments, surface renderings were automatically created based  
2 on the red channel at consecutive stages through the movies. Volume, height and  
3 width measurements were made as described above for whole tail segmentations.

4

#### 5 Preparation of mouse, dogfish and lamprey samples

6 Mice: mT/mG double-fluorescent Cre reporter mice were utilized in t order to  
7 generate mice with membrane targeted mTomato to visualize membranes  
8 (Muzumdar et al., 2007). Dogfish (*S. canicula*) eggs and lamprey embryos were  
9 produced by the Roscoff Marine Station and incubated at 17<sup>0</sup>C in oxygenated sea  
10 water until dissection and fixation in 4% PFA. Embryos were staged according to  
11 (Ballard et al., 1993). Lamprey (*L. fluviatilis*) embryos were obtained by in vitro  
12 fertilization and incubated at 17°C in oxygenated tap water until the required stages.  
13 Staging was performed according to (Tahara, 1988).

14

#### 15 Imaging of fixed samples

16 Fixed zebrafish embryos previously injected with nls-mCherry and membrane-GFP  
17 were embedded in 1% low melting point agarose an imaged either on a Zeiss  
18 Lightsheet Z.1 microscope (at 3- and 6- somite stages) or on a Leica SP5 one-  
19 photon confocal at subsequent stages. Lamprey, mouse and Dogfish embryos were  
20 incubated with DAPI in PBS-0.01% Tween overnight at 4 <sup>0</sup>C prior to imaging.  
21 Lamprey embryos were using a Leica SP5 one-photon confocal. Mouse and Dogfish  
22 embryos were mounted in small chambers containing RapidClear solution (Sunjin  
23 labs) and imaged on a Zeiss LSM 7 MP multiphoton microscope. Images were tiled

1 and automatically stitched together using microscope software in order to visualize  
2 the entire posterior body of large specimens.

3

#### 4 **Acknowledgments**

5 We would like to thank Alfonso Martinez-Arias for critical readings of the manuscript  
6 and Eric Theveneau, Simon Restrepo and Carlos Carmona-Fontaine for further  
7 essential commentary. We are indebted to Pascal Dardenne for excellent animal  
8 care and Christine Chevalier for help in isolating mouse embryos. We would further  
9 like to thank Ian Scott for the gift of the nls-Kikume construct. Finally, we  
10 acknowledge the Plateforme d'Imagerie Dynamique, Institut Pasteur, for their  
11 excellent imaging service and support. The authors declare no competing interests.

12

#### 13 **Author Contribution**

14 BS, EH and JFN conceived the project. BS performed most of the experiments. FD  
15 aided in performing morphometric measurements. EH performed live imaging for  
16 gastrula stage fate maps. RL and SM aided in staging and obtaining lamprey and  
17 dogfish embryos. BS and EH interpreted the results. BS wrote and EH edited the  
18 paper prior to submission.

19

#### 20 **Funding information**

Jean-François Nicolas, Estelle Hirsinger: Core funding from the Institut Pasteur  
Agence Nationale de la Recherche  
ANR-10-BLAN-121801 DEVPROCESS  
Estelle Hirsinger: Centre National de la Recherche Scientifique  
(National Center for Scientific Research)

François Nicolas: Institut national de la santé et de la recherche médicale  
Benjamin Steventon: AFM-Téléthon (French Muscular Dystrophy Association)  
Post-doctoral fellowship  
Benjamin John Steventon: Post-doctoral fellowship, Insitut Pasteur  
The funders had no role in study design, data collection and interpretation,  
or the decision to submit the work for publication.

1

2

### 3 **References**

4 **Baker, K. D., Ramel, M. C. and Lekven, A. C.** (2010). A direct role for Wnt8 in  
5 ventrolateral mesoderm patterning. *Dev. Dyn.* **239**, 2828–2836.

6 **Ballard, W. W., Mellinger, J. and Lechenault, H.** (1993). A series of normal stages  
7 for development of *Scyliorhinus canicula*, the lesser spotted  
8 dogfish(Chondrichthyes: Scyliorhinidae). *J. Exp. Zool.* **267**, 318–336.

9 **Beddington, R. S.** (1994). Induction of a second neural axis by the mouse node.  
10 *Development* **120**, 613–620.

11 **Bénazéraf, B., François, P., Baker, R. E., Denans, N., Little, C. D. and Pourquié,**  
12 **O.** (2010). A random cell motility gradient downstream of FGF controls  
13 elongation of an amniote embryo. *Nature* **466**, 248–252.

14 **Boehm, B., Westerberg, H., Lesnicar-Pucko, G., Raja, S., Rautschka, M.,**  
15 **Cotterell, J., Swoger, J. and Sharpe, J.** (2010). The Role of Spatially  
16 Controlled Cell Proliferation in Limb Bud Morphogenesis. *PLoS Biol.* **8**,  
17 e1000420.

18 **Bolognesi, R., Farzana, L., Fischer, T. D. and Brown, S. J.** (2008). Multiple Wnt  
19 Genes Are Required for Segmentation in the Short-Germ Embryo of *Tribolium*  
20 *castaneum*. *Curr. Biol.* **18**, 1624–1629.

21 **Bouldin, C. M., Snelson, C. D., Farr, G. H. and Kimelman, D.** (2014). Restricted  
22 expression of *cdc25a* in the tailbud is essential for formation of the zebrafish  
23 posterior body. *Genes Dev.* **28**, 384–395.

24 **Cambray, N. and Wilson, V.** (2002). Axial progenitors with extensive potency are  
25 localised to the mouse chordoneural hinge. *Development* **129**, 4855–4866.

26 **Copf, T., Schröder, R. and Averof, M.** (2004). Ancestral role of caudal genes in  
27 axis elongation and segmentation. *Proc. Natl. Acad. Sci. U. S. A.* **101**, 17711–  
28 17715.



- 1 **Del Corral, R. D. and Storey, K. G.** (2004). Opposing FGF and retinoid pathways: a  
2 signalling switch that controls differentiation and patterning onset in the  
3 extending vertebrate body axis. *BioEssays* **26**, 857–869.
- 4 **Ellis, K., Hoffman, B. D. and Bagnat, M.** (2013). The vacuole within: how cellular  
5 organization dictates notochord function. *Bioarchitecture* **3**, 64–68.
- 6 **Esterberg, R. and Fritz, A.** (2009). *dlx3b/4b* are required for the formation of the  
7 preplacodal region and otic placode through local modulation of BMP activity.  
8 *Dev. Biol.* **325**, 189–199.
- 9 **Glickman, N. S., Kimmel, C. B., Jones, M. A. and Adams, R. J.** (2003). Shaping  
10 the zebrafish notochord. *Development* **130**, 873–887.
- 11 **Hatta, K., Tsujii, H. and Omura, T.** (2006). Cell tracking using a photoconvertible  
12 fluorescent protein. *Nat. Protoc.* **1**, 960–967.
- 13 **Kanki, J. P. and Ho, R. K.** (1997). The development of the posterior body in  
14 zebrafish. *Development* **124**, 881–893.
- 15 **Kimmel, C. B., Ballard, W. W., Kimmel, S. R., Ullmann, B. and Schilling, T. F.**  
16 (1995). Stages of embryonic development of the zebrafish. *Dev. Dyn.* **203**, 253–  
17 310.
- 18 **Lawton, A. K., Nandi, A., Stulberg, M. J., Dray, N., Sneddon, M. W., Pontius, W.,**  
19 **Emonet, T. and Holley, S. A.** (2013). Regulated tissue fluidity steers zebrafish  
20 body elongation. *Development* **140**, 573–582.
- 21 **Marlow, F., Gonzalez, E. M., Yin, C., Rojo, C. and Solnica-Krezel, L.** (2004). No  
22 tail co-operates with non-canonical Wnt signaling to regulate posterior body  
23 morphogenesis in zebrafish. *Development* **131**, 203–216.
- 24 **Martin, B. L. and Kimelman, D.** (2009). Wnt Signaling and the Evolution of  
25 Embryonic Posterior Development. *CURBIO* **19**, R215–R219.
- 26 **Martin, B. L. and Kimelman, D.** (2010). Brachyury establishes the embryonic  
27 mesodermal progenitor niche. *Genes Dev.* **24**, 2778–2783.
- 28 **Martin, B. L. and Kimelman, D.** (2012). Canonical Wnt Signaling Dynamically  
29 Controls Multiple Stem Cell Fate Decisions during Vertebrate Body Formation.  
30 *Dev. Cell* **22**, 223–232.
- 31 **Mathis, L. and Nicolas, J. F.** (2000). Different clonal dispersion in the rostral and  
32 caudal mouse central nervous system. *Development* **127**, 1277–1290.



- 1 **McGregor, A. P., Pechmann, M., Schwager, E. E., Feitosa, N. M., Kruck, S.,**  
2 **Aranda, M. and Damen, W. G. M.** (2008). Wnt8 Is Required for Growth-Zone  
3 Establishment and Development of Opisthosomal Segments in a Spider. *Curr.*  
4 *Biol.* **18**, 1619–1623.
- 5 **McGrew, M. J., Sherman, A., Lillico, S. G., Ellard, F. M., Radcliffe, P. A.,**  
6 **Gilhooley, H. J., Mitrophanous, K. A., Cambray, N., Wilson, V. and Sang, H.**  
7 (2008). Localised axial progenitor cell populations in the avian tail bud are not  
8 committed to a posterior Hox identity. *Development* **135**, 2289–2299.
- 9 **Muzumdar, M. D., Tasic, B., Miyamichi, K., Li, L. and Luo, L.** (2007). A global  
10 double-fluorescent Cre reporter mouse. *genesis* **45**, 593–605.
- 11 **Nicolas, J. F., Mathis, L., Bonnerot, C. and Saurin, W.** (1996). Evidence in the  
12 mouse for self-renewing stem cells in the formation of a segmented longitudinal  
13 structure, the myotome. *Development* **122**, 2933–2946.
- 14 **Olivera-Martinez, I., Harada, H., Halley, P. A. and Storey, K. G.** (2012). Loss of  
15 FGF-Dependent Mesoderm Identity and Rise of Endogenous Retinoid Signalling  
16 Determine Cessation of Body Axis Elongation. *PLoS Biol.* **10**, e1001415.
- 17 **Richardson, M. K., Allen, S. P., Wright, G. M., Raynaud, A. and Hanken, J.**  
18 (1998). Somite number and vertebrate evolution. *Development* **125**, 151–160.
- 19 **Riley, B. B., Sweet, E. M., Heck, R., Evans, A., Mcfarland, K. N., Warga, R. M.**  
20 **and Kane, D. A.** (2010). Characterization of harpy/Rca1/emi1 mutants:  
21 Patterning in the absence of cell division. *Dev. Dyn.* **239**, 828–843.
- 22 **Row, R. H. and Kimelman, D.** (2009). Bmp inhibition is necessary for post-  
23 gastrulation patterning and morphogenesis of the zebrafish tailbud. *Dev. Biol.*  
24 **329**, 55–63.
- 25 **Sauka-Spengler, T., Baratte, B., Lepage, M. and Mazan, S.** (2003).  
26 Characterization of Brachyury genes in the dogfish *S. canicula* and the lamprey  
27 *L. fluviatilis*. Insights into gastrulation in a chondrichthyan. *Dev. Biol.* **263**, 296–  
28 307.
- 29 **Schubert, M., Holland, L. Z., Stokes, M. D. and Holland, N. D.** (2001). Three  
30 Amphioxus Wnt Genes (AmphiWnt3, AmphiWnt5, and AmphiWnt6) Associated  
31 with the Tail Bud: the Evolution of Somitogenesis in Chordates. *Dev. Biol.* **240**,  
32 262–273.
- 33 **Schubert, M., Escriva, H., Xavier-Neto, J. and Laudet, V.** (2006). Amphioxus and  
34 tunicates as evolutionary model systems. *Trends Ecol. Evol.* **21**, 269–277.

- 1 **Schulz, C., Schröder, R., Hausdorf, B., Wolff, C. and Tautz, D.** (1998). A caudal  
2 homologue in the short germ band beetle *Tribolium* shows similarities to both,  
3 the *Drosophila* and the vertebrate caudal expression patterns. *Dev. Genes Evol.*  
4 **208**, 283–289.
- 5 **Selleck, M. A. and Stern, C. D.** (1991). Fate mapping and cell lineage analysis of  
6 Hensen's node in the chick embryo. *Development* **112**, 615–626.
- 7 **Shimizu, T., Bae, Y. K., Muraoka, O. and Hibi, M.** (2005). Interaction of Wnt and  
8 caudal-related genes in zebrafish posterior body formation. *Dev. Biol.* **279**, 125–  
9 141.
- 10 **Sugiyama, M., Sakaue-Sawano, A., Imura, T., Fukami, K., Kitaguchi, T.,**  
11 **Kawakami, K., Okamoto, H., Higashijima, S. and Miyawaki, A.** (2009).  
12 Illuminating cell-cycle progression in the developing zebrafish embryo. *Proc.*  
13 *Natl. Acad. Sci.* **106**, 20812–20817.
- 14 **Tahara, Y.** (1988). Normal Stages of Development in Lamprey, *Lampetra reissneri*  
15 (Dybowski). *Zoolog. Sci.* **5**, 109–118.
- 16 **Thorpe, C. J.** (2005). Wnt/ -catenin regulation of the Sp1-related transcription factor  
17 sp5l promotes tail development in zebrafish. *Development* **132**, 1763–1772.
- 18 **Tzouanacou, E., Wegener, A., Wymeersch, F. J., Wilson, V. and Nicolas, J.-F.**  
19 (2009). Redefining the Progression of Lineage Segregations during Mammalian  
20 Embryogenesis by Clonal Analysis. *Dev. Cell* **17**, 365–376.
- 21 **Yang, Y. and Thorpe, C.** (2011). BMP and non-canonical Wnt signaling are required  
22 for inhibition of secondary tail formation in zebrafish. *Development* **138**, 2601–  
23 2611.
- 24 **Zhang, L., Kendrick, C., Jülich, D. and Holley, S. A.** (2008). Cell cycle progression  
25 is required for zebrafish somite morphogenesis but not segmentation clock  
26 function. *Development* **135**, 2065–2070.
- 27
